# Supplementary material
Source: JCI journal article supplement (doi:10.1172/jci197108)
Supplement: sd1 [file 1]

Supplementary Material 1: Univariate Cox regression for MCC-specific survival in the full population, with adjusted p-values after the Benjamini-Hochberg method.

| Gene           | HR (95% CI)        | <i>p</i> -value | Adjusted <i>p</i> -value |
|----------------|--------------------|-----------------|--------------------------|
| <i>PIK3CA</i>  | 3.07 (1.74 – 5.41) | < 0.001         | 0.003                    |
| <i>SETBP1</i>  | 3.18 (1.74 – 5.82) | < 0.001         | 0.002                    |
| <i>KDR</i>     | 2.78 (1.59 – 4.86) | < 0.001         | 0.028                    |
| <i>RET</i>     | 2.1 (1.25 – 3.53)  | 0.005           | 0.033                    |
| <i>NF1</i>     | 2.07 (1.13 – 2.79) | 0.018           | 0.09                     |
| <i>ASXL1</i>   | 2.14 (1.11 – 4.13) | 0.023           | 0.1                      |
| <i>RB1</i>     | 1.68 (1.02 – 2.79) | 0.042           | 0.15                     |
| <i>ARID1B</i>  | 1.88 (1.01 – 3.50) | 0.046           | 0.14                     |
| <i>KMT2D</i>   | 1.73 (1.00 – 3.00) | 0.052           | 0.14                     |
| <i>CREBBP</i>  | 1.84 (0.95 – 3.54) | 0.070           | 0.17                     |
| <i>ARID1a</i>  | 1.75 (0.94 – 3.23) | 0.076           | 0.17                     |
| <i>NOTCH2</i>  | 1.64 (0.88 – 3.05) | 0.12            | 0.25                     |
| <i>TP53</i>    | 1.46 (0.88 – 2.43) | 0.14            | 0.27                     |
| <i>KMT2A</i>   | 1.50 (0.84 – 2.67) | 0.17            | 0.30                     |
| <i>PIK3CB</i>  | 1.38 (0.68 – 2.82) | 0.38            | 0.63                     |
| <i>ROS1</i>    | 1.30 (0.67 – 2.52) | 0.43            | 0.68                     |
| <i>MTOR</i>    | 0.76 (0.38 – 1.55) | 0.46            | 0.67                     |
| <i>ERBB4</i>   | 1.29 (0.63 – 2.62) | 0.49            | 0.68                     |
| <i>APC</i>     | 1.24 (0.68 – 2.26) | 0.49            | 0.64                     |
| <i>BRCA2</i>   | 1.23 (0.68 – 2.21) | 0.49            | 0.61                     |
| <i>SMARCA4</i> | 0.85 (0.42 – 1.72) | 0.65            | 0.77                     |
| <i>FAT1</i>    | 0.87 (0.41 – 1.83) | 0.71            | 0.81                     |
| <i>CUX1</i>    | 1.11 (0.56 – 2.20) | 0.76            | 0.83                     |
| <i>NOTCH1</i>  | 1.09 (0.63 – 1.87) | 0.77            | 0.8                      |
| <i>GLI2</i>    | 0.97 (0.41 – 2.25) | 0.94            | 0.94                     |

Supplementary Material 2: Multivariable Cox regression model for *PIK3CA* and MCC-specific survival, performed separately for each selected gene and adjusted variables.

| Variable      | HR (95% CI)         | <i>p</i> |
|---------------|---------------------|----------|
| <i>PIK3CA</i> | 2.07 (1.10 – 3.88)  | 0.024    |
| Age           | 1.03 (1.00 – 1.05)  | 0.043    |
| TMB           | 1.00 (0.99 – 1.02)  | 0.64     |
| Stage III     | 2.05 (0.87 – 4.82)  | 0.10     |
| Stage IV      | 7.50 (3.04 – 18.50) | < 0.001  |
| Immunotherapy | 1.91 (1.02 – 3.55)  | 0.042    |

Supplementary Material 3: Multivariable Cox regression model for *SETBP1* and MCC-specific survival, performed separately for each selected gene and adjusted variables.

| Variable      | HR (95% CI)         | <i>p</i> |
|---------------|---------------------|----------|
| <i>SETBP1</i> | 1.28 (0.63 – 2.60)  | 0.50     |
| Age           | 1.02 (0.99 – 1.05)  | 0.19     |
| TMB           | 1.01 (1.00 – 1.02)  | 0.27     |
| Stage III     | 1.81 (0.77 – 4.24)  | 0.17     |
| Stage IV      | 6.37 (2.57 – 15.76) | < 0.001  |
| Immunotherapy | 2.12 (1.15 – 3.92)  | 0.017    |

Supplementary Material 4: Multivariable Cox regression model for KDR and MCC-specific survival, performed separately for each selected gene and adjusted variables.

| Variable      | HR (95% CI)         | <i>p</i> |
|---------------|---------------------|----------|
| <i>KDR</i>    | 1.37 (0.69 – 2.71)  | 0.37     |
| Age           | 1.02 (0.99 – 1.05)  | 0.17     |
| TMB           | 1.01 (0.99 – 1.02)  | 0.39     |
| Stage III     | 1.91 (0.81 – 4.49)  | 0.14     |
| Stage IV      | 6.37 (2.60 – 15.65) | < 0.001  |
| Immunotherapy | 2.13 (1.16 – 3.93)  | 0.015    |

Supplementary Material 5: Multivariable Cox regression model for RET and MCC-specific survival, performed separately for each selected gene and adjusted variables.

| Variable      | HR (95% CI)         | <i>p</i> |
|---------------|---------------------|----------|
| <i>RET</i>    | 1.61 (0.94 – 2.74)  | 0.08     |
| Age           | 1.02 (1.00 – 1.05)  | 0.07     |
| TMB           | 1.01 (0.99 – 1.02)  | 0.38     |
| Stage III     | 1.86 (0.79 – 4.37)  | 0.15     |
| Stage IV      | 6.85 (2.81 – 16.71) | < 0.001  |
| Immunotherapy | 2.11 (1.16 – 3.83)  | 0.014    |

Supplementary Material 6: Baseline clinicopathologic and treatment characteristics according to *PIK3CA* mutation status. Normally distributed continuous variables were tested with two-tailed Student's t-test and non-normally distributed continuous variables were tested with Wilcoxon test. Categorical variables were tested with chi-square/Fisher exact test.

| Variable      |              | <i>PIK3CA</i> mutated | <i>PIK3CA</i> wild type | <i>p</i> |
|---------------|--------------|-----------------------|-------------------------|----------|
| n             |              | 22 (27.5%)            | 58 (72.5%)              |          |
| Age           | Mean (SD)    | 72.6 (16.3)           | 74.3 (9.6)              | 0.64     |
| Male Sex      | n (%)        | 12 (54.5%)            | 42 (72.4%)              | 0.21     |
| Stage         | I/II         | 6 (27.3%)             | 14 (24.1%)              | 0.62     |
|               | III          | 10 (45.5%)            | 33 (56.9%)              |          |
|               | IV           | 6 (27.3%)             | 11 (19.0%)              |          |
| TMB           | Median (IQR) | 36.1 (18.0 – 44.8)    | 25.3 (13.5 – 31.0)      | 0.04     |
| Immunotherapy | n (%)        | 14 (63.6%)            | 22 (37.9%)              | 0.07     |

Supplementary Material 7. Prognostic impact of *PIK3CA* status across different clinical contexts. Hazard ratios (HR), 95% confidence intervals (CI), and p-values derived from multivariable Cox regression models and sensitivity analyses. The primary multivariable model was adjusted for age, stage, immunotherapy use, and tumor mutational burden (TMB). Sensitivity analyses include: (1) high-TMB subgroup; (2) model excluding immunotherapy; (3) stage I–III restricted cohort; and (4) Fine-Gray subdistribution hazard model for competing risks.

| Sensitivity Analysis             | HR (95% CI)        | <i>p</i> |
|----------------------------------|--------------------|----------|
| Multivariable Cox Regression     | 2.07 (1.10 – 3.88) | 0.024    |
| High TMB Population              | 2.52 (1.20 – 5.27) | 0.014    |
| Excluding Immunotherapy variable | 2.43 (1.31 – 4.54) | 0.005    |
| Excluding Stage IV patients      | 3.03 (1.22 – 7.51) | 0.017    |
| Competing Risks                  | 2.12 (1.06 – 4.26) | 0.035    |
